# Supplementary material
Source: Springer Nature journal article supplement (https://www.springermedizin.de/resource/supplementary/13054_2010_8862_MOESM2_ESM.pdf/9732774)

A

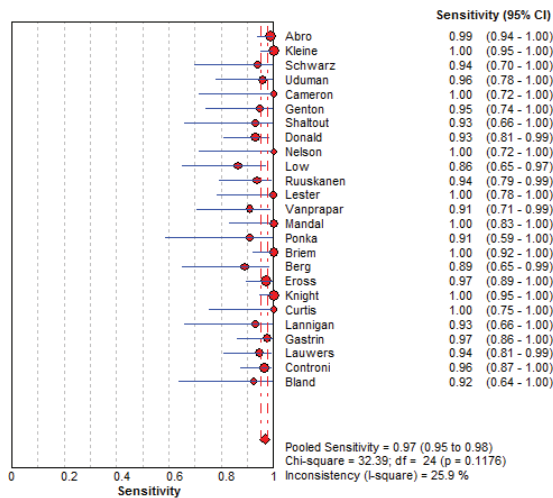

B

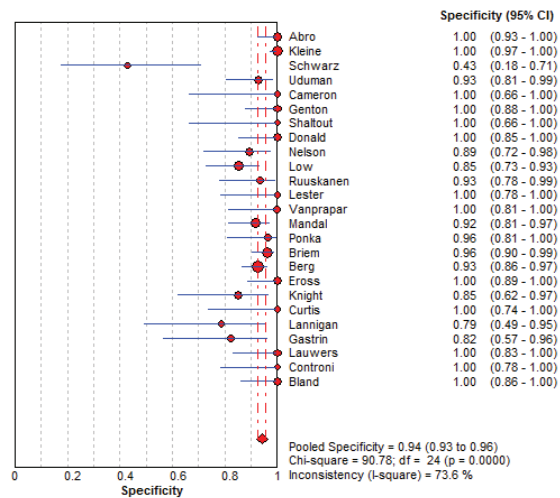

C

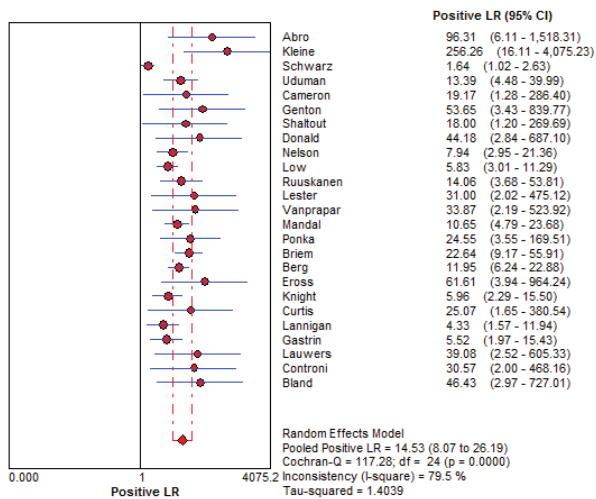

D

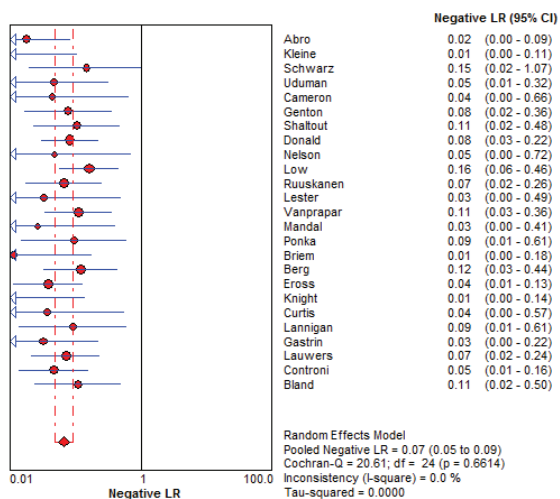

E

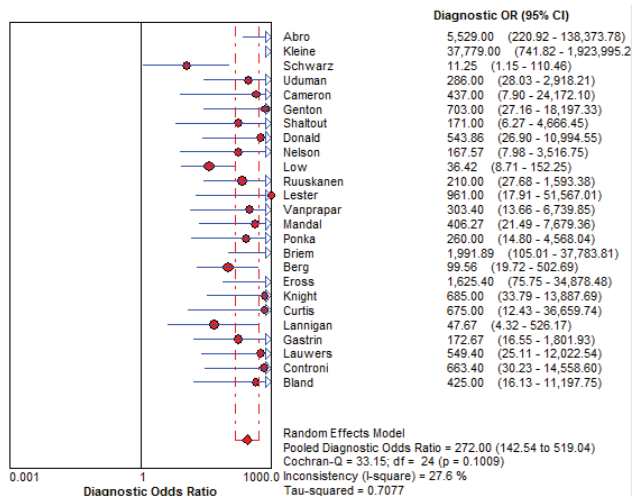

#### Analysis Options:

Add 1/2 to all cells of the studies with zero  
Filter OFF

Supplement: MOESM2 [file 9732774]
